# Supplementary material for: Machine learning-augmented docking. 1. CYP inhibition prediction
Source: Royal Society of Chemistry journal article supplement (doi:10.1039/d3dd00110e), 2023-01-01
Supplement: d3dd00110e1.pdf [file d3dd00110e1.pdf]

# Supporting Information for Machine Learning-Augmented Docking

## 1. CYP inhibition prediction

Benjamin Weiser, Jerome Genzling, Mihai Burai Patrascu, Ophélie Rostaing and Nicolas Moitessier\*

### Code Workflow Procedure

1. Cleaned and combined test and train Pei sets with CYP\_clean\_files.ipnyb. Sets combined and then clustered to create new train and test sets
2. Dock each ligand 5 times to its respective isoform using FITTED. Docked data can be found here: (to be inserted)
3. Create analogue sets using FITTED. Create max train-test similarity using CYP\_TC\_DataSets.py
4. Run RF with Feature Importances using max train-test similarity of 0.8 using ML\_over\_Tanimoto.py which calls CYP\_inhibition\_functions.py and Do\_ML2.py
5. Using these selected features run all ML models on all datasets using ML\_over\_Tanimoto.py which calls CYP\_inhibition\_functions.py and Do\_ML2.py
6. Use CYP\_evaluate\_and\_ensemble.py which calls CYP\_evaluate\_and\_ensemble\_functions.py to make ensembles and evaluate and graph model performance

### 1 List of input Ligand Features

- Energy
- van der Waals
- Electrostatics
- Hydrogen Bonds
- Hydrogen Bond-like Metal interaction
- Metal Coordination
- Water van der Waals
- Water Electrostatics
- Water Hydrogen Bonds
- Number of Water Molecules
- Number of Rotatable Bonds
- Rotatable Bonds Entropy
- Non-polar Solvation Energy
- Polar Ligand Solvation Energy
- Polar Protein Solvation Energy
- RMSD
- RMSD (MBG)
- Strain Energy
- RankScore
- MatchScore
- Molecular Weight
- Net Charge
- Hydrogen Bond Donors
- Hydrogen Bond Acceptors
- Rotatable Bonds
- Rings
- Ionizable Centers
- Oxygens
- Nitrogens
- Sulfurs
- Heteroatoms
- Heavy Atoms
- Michael Acceptors
- tPSA
- logP
- Fsp3
- Stereogenic Centers Ratio
- logS
- Stereogenic Centers
- Aromatic Rings
- Aromatic Proportion
- Halogens
- McGowan Molecular Volume
- Molecular van der Waals Surface Area
- Polar SASA
- non Polar SASA
- Molecular Density
- Molecular Polarity
- Blood-Brain Barrier
- Molecular Softness
- Molecular Electronegativity
- Negatively Charged Oxygens
- Positively Charged Nitrogen
- Molecular Hardness
- Molecular Polarizability
- 3D-Wiener Index
- Geometric Radius
- Geometric Diameter
- Geometrical Shape Coefficient
- Span
- Radius of Gyration
- Ovality Index
- Globularity Factor

- Dipole moment
- Badapple pscore
- Quantitative Estimate of Druglikeness
- aromatic
- carboxylic acid
- carboxylate
- ester aromatic
- ester aliphatic
- ester conjugated
- ester
- lactone
- aldehyde aromatic
- aldehyde aliphatic
- aldehyde conjugated
- aldehyde
- acyl chloride
- acyl bromide
- amide ter
- amide
- lactame
- anhydride
- ketone
- sulfonamide
- thiol
- thiolate
- carbamate
- primary amine
- secondary amine
- tertiary amine
- quat ammonium
- amine
- aniline
- nitrile
- imine
- oxime
- nitro
- nitroso
- azide
- isocyanate
- hydroxamic acid
- hydroxamate
- alkyl chloride
- alkyl bromide
- alkyl iodide
- aryl chloride
- aryl bromide
- aryl iodide
- boronic acid aromatic
- boronic ester aromatic
- boronic acid aliphatic
- boronic ester aliphatic
- boronic acid vinylic
- boronic ester vinylic
- boronic acid
- sulfonyl chloride
- sulfonyl bromide
- vinyl chloride
- vinyl bromide
- vinyl iodide
- alkene
- ketone O
- formyl
- alcohol
- chloride
- bromide
- fluoride
- iodide
- silicon
- primary amine neutral
- secondary amine neutral
- tertiary amine neutral
- alpha fluoroketone
- alpha chloroketone
- epoxide
- aziridine
- beta-lactam
- primary alcohol
- disulfide
- azo
- isothiocyanate
- hydrazine
- ketene
- peroxide
- silyl fluoride
- silyl bromide
- silyl chloride
- silyl iodide
- thiocarbonyl
- thioester
- betaKeto

## Figures and Tables

Table S1: Dataset sizes for 5 CYP P450 isoforms

|                           | 1A2   | 2C19  | 2C9   | 2D6   | 3A4   |
|---------------------------|-------|-------|-------|-------|-------|
| Before Cleaning Data Size | 10072 | 10769 | 10050 | 10851 | 11436 |
| After Cleaning Data Size  | 9773  | 10636 | 9935  | 10717 | 11401 |
| # Actives                 | 3598  | 4564  | 2603  | 1406  | 3602  |
| # Inactives               | 6175  | 6072  | 7332  | 9311  | 7799  |

## Protein structures (PDB IDs)

CYP1A2: 2HI4, CYP2C9: 1R9O, CYP2C19: 4GQS, CYP2D6: 3QM4, CYP3A4: 3NXU

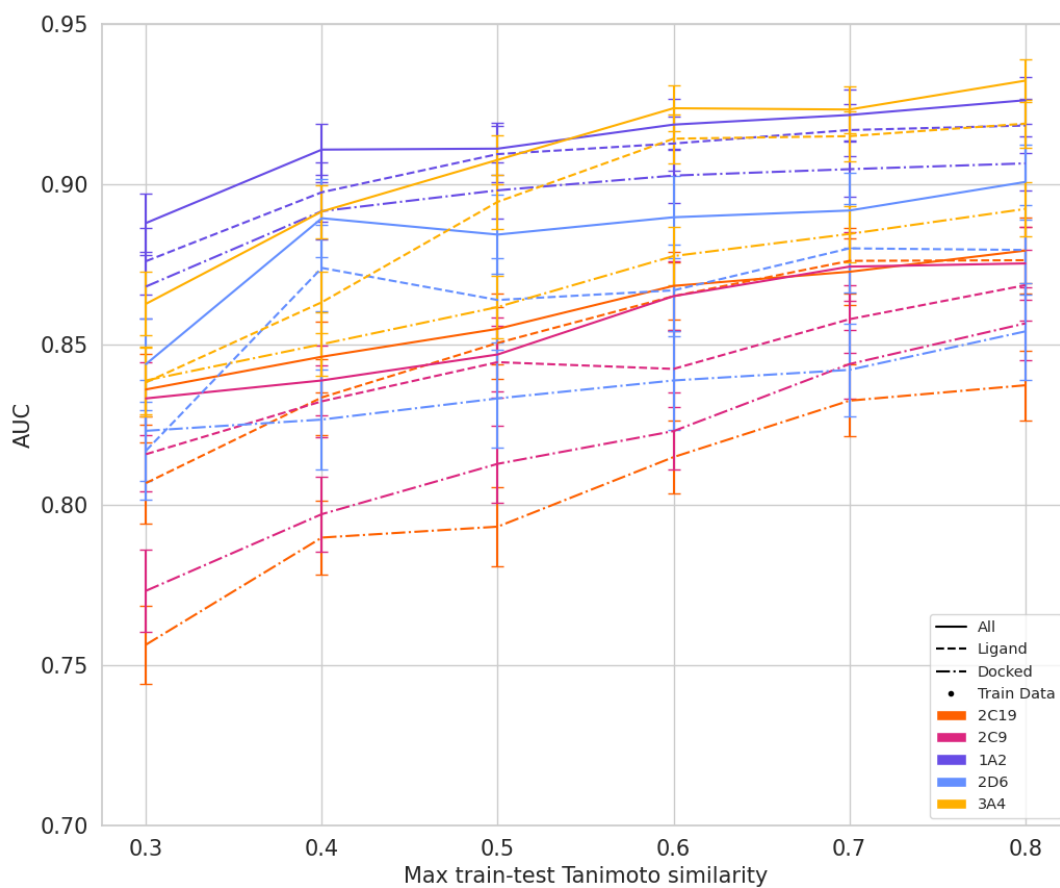

Figure S1: AUC of ML augmented docking using ligand only features, docking features, and all features over max train-test Tanimoto similarity

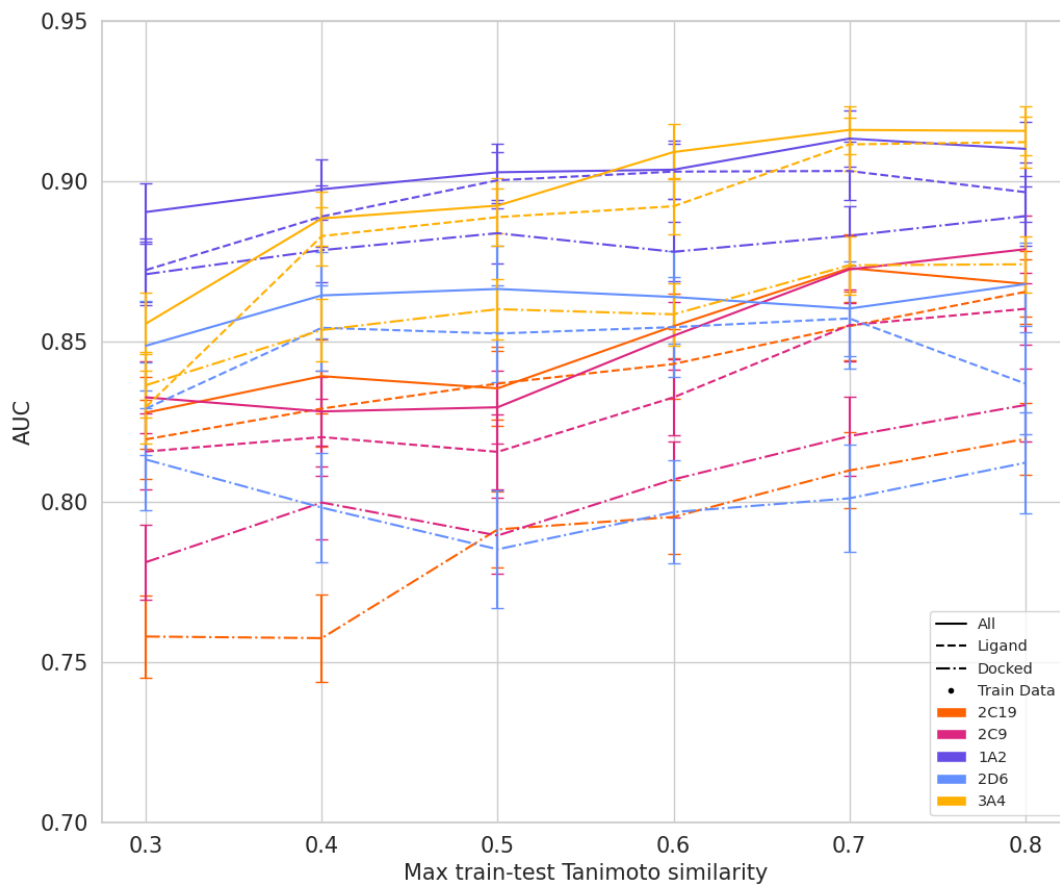

Figure S2: AUC of ML augmented docking using ligand-only features, docking features, and all features over max train-test Tanimoto similarity using same data sizes. Data size capped at data size of 0.3. Data size used; 1A2: 2406, 2C9: 2622, 2C19: 2698, 2D6: 2789, 3A4: 2649. Using all features become more predictive than ligand featurization at low Tanimoto similarity

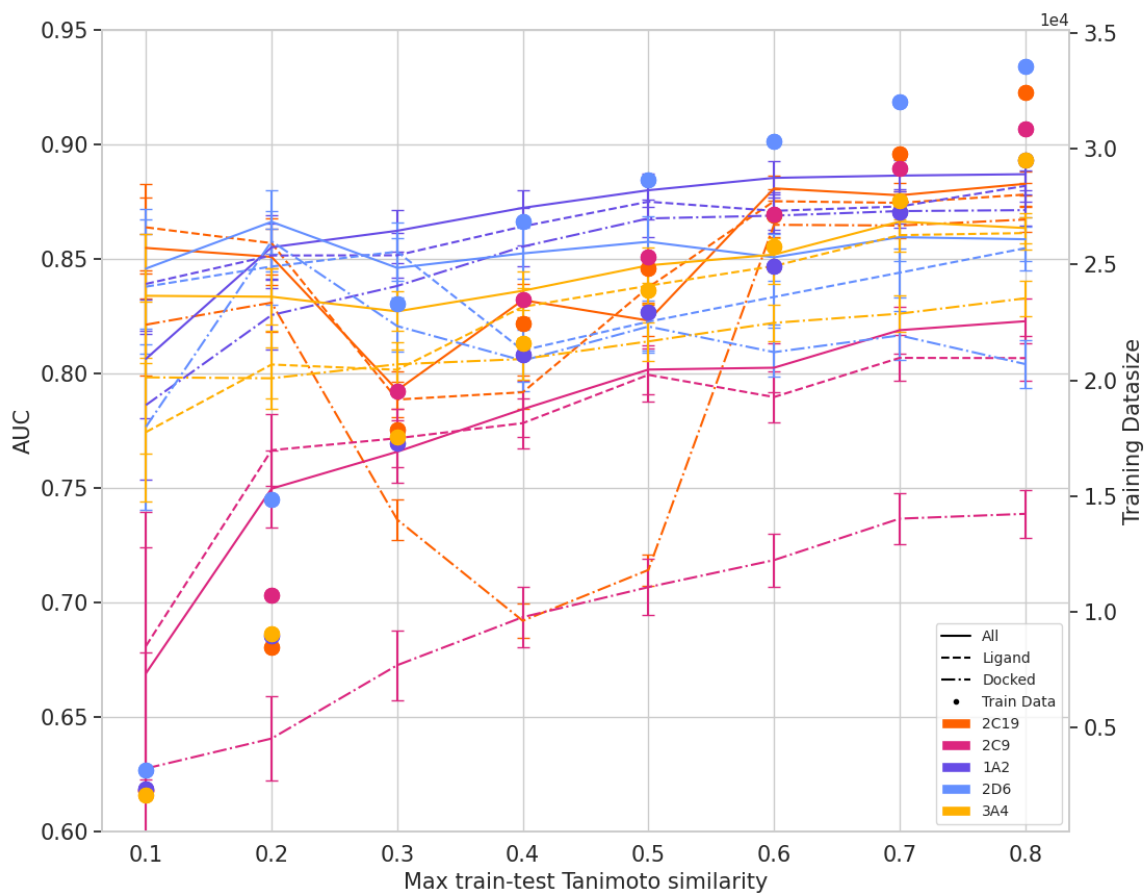

Figure S3: AUC of ML augmented docking using ligand only features, docking features, and all features over max train-test Tanimoto similarity using analog datasets

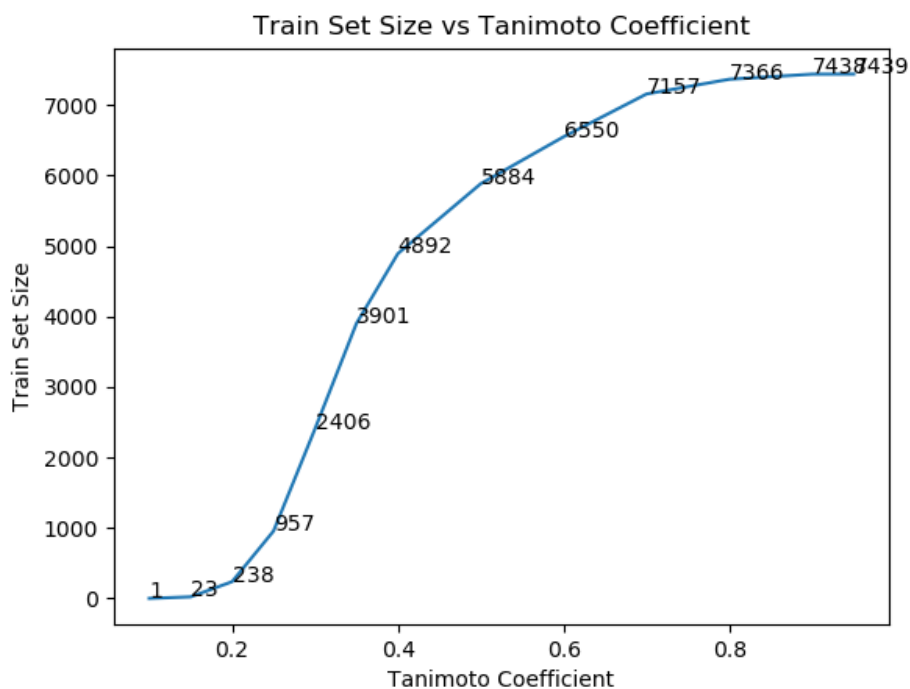

Figure S4: 1A2 CYP inhibition data set size after filtering by max similarity between test and train set using a test set of 100 clusters of 5 molecules.

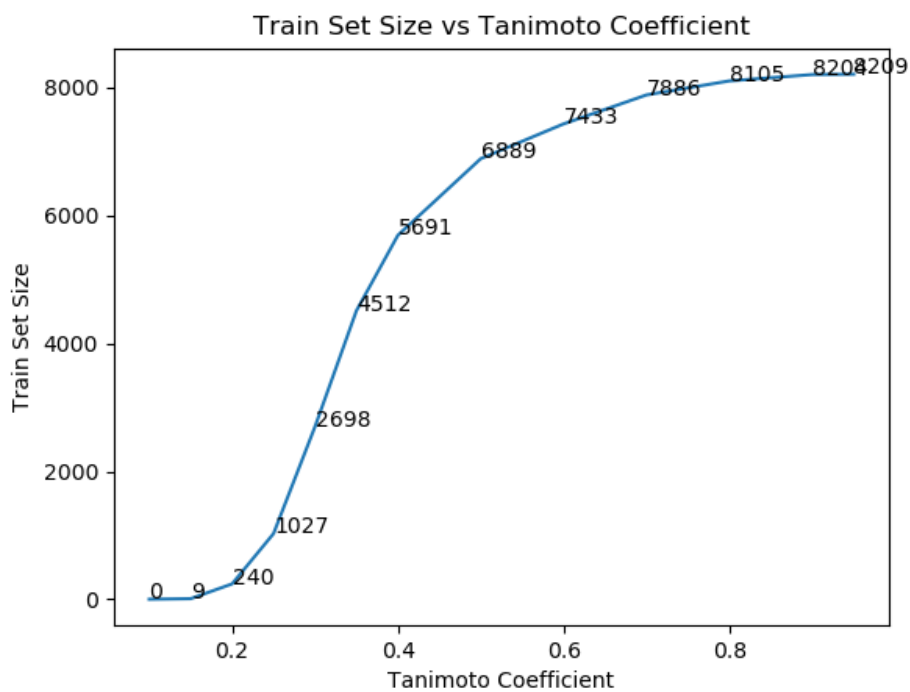

Figure S5: 2C19 CYP inhibition data set size after filtering by max similarity between test and train set using a test set of 100 clusters of 5 molecules.

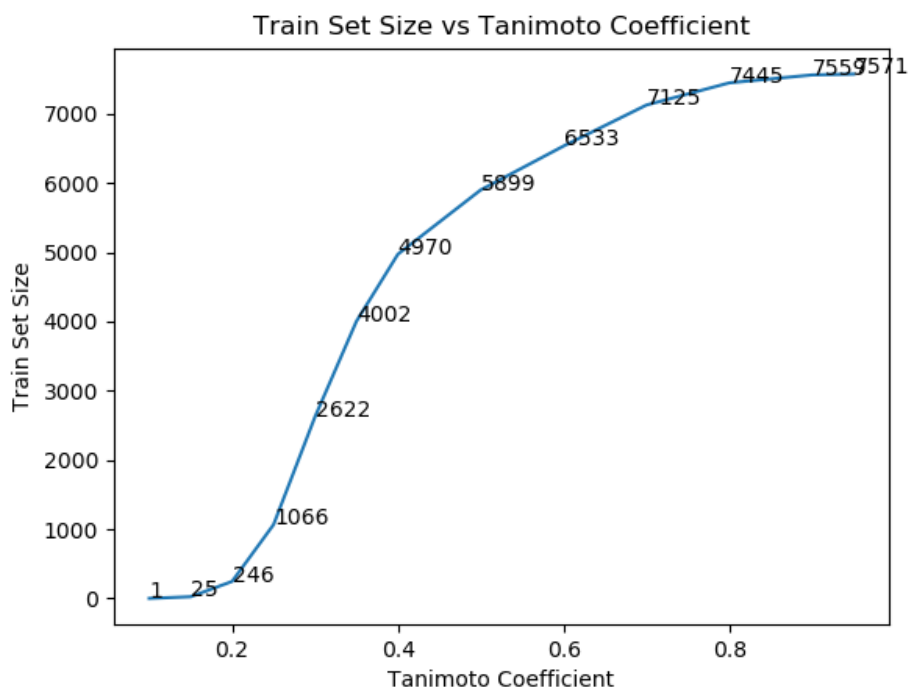

Figure S6: 2C9 CYP inhibition data set size after filtering by max similarity between test and train set using a test set of 100 clusters of 5 molecules.

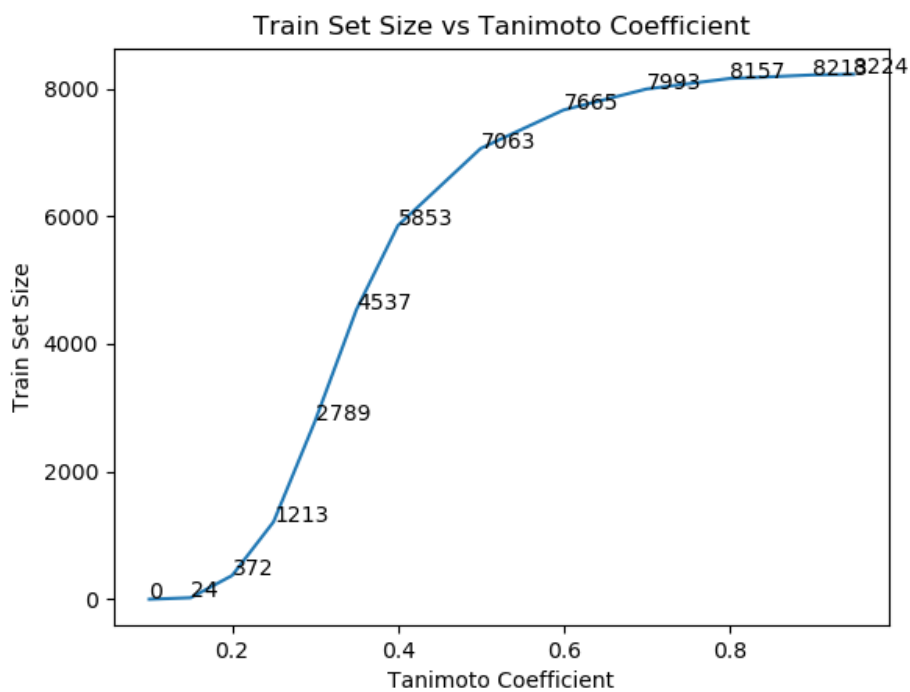

Figure S7: 2D6 CYP inhibition data set size after filtering by max similarity between test and train set using a test set of 100 clusters of 5 molecules.

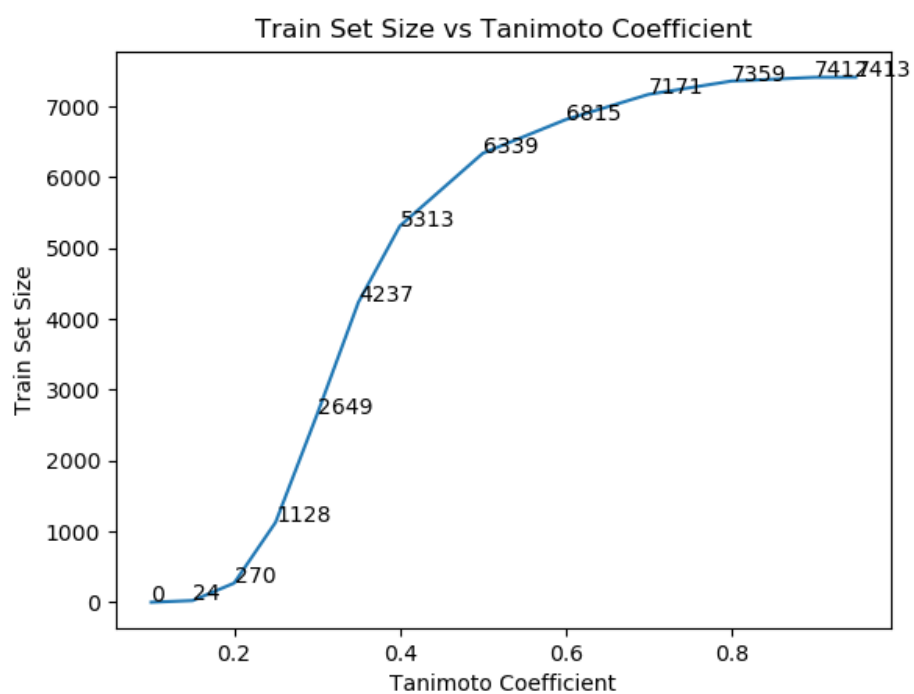

Figure S8: 3A4 CYP inhibition data set size after filtering by max similarity between test and train set using a test set of 100 clusters of 5 molecules.



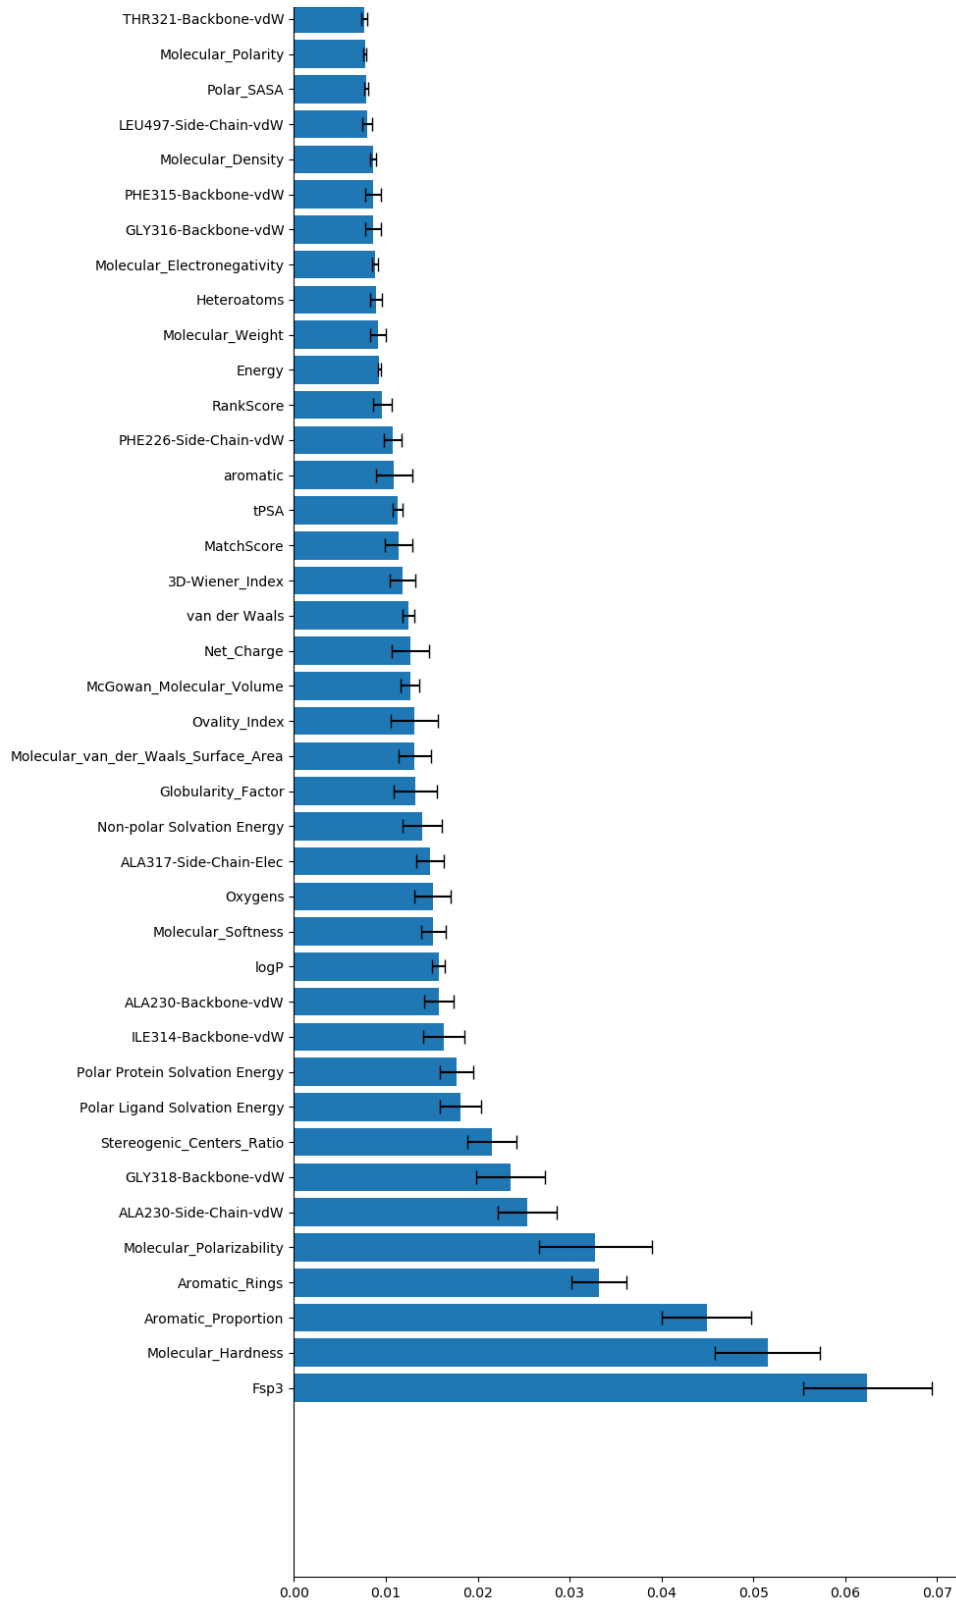

Figure S9: Feature importance of random forest model using selected top 100 features for isoform 1A2.

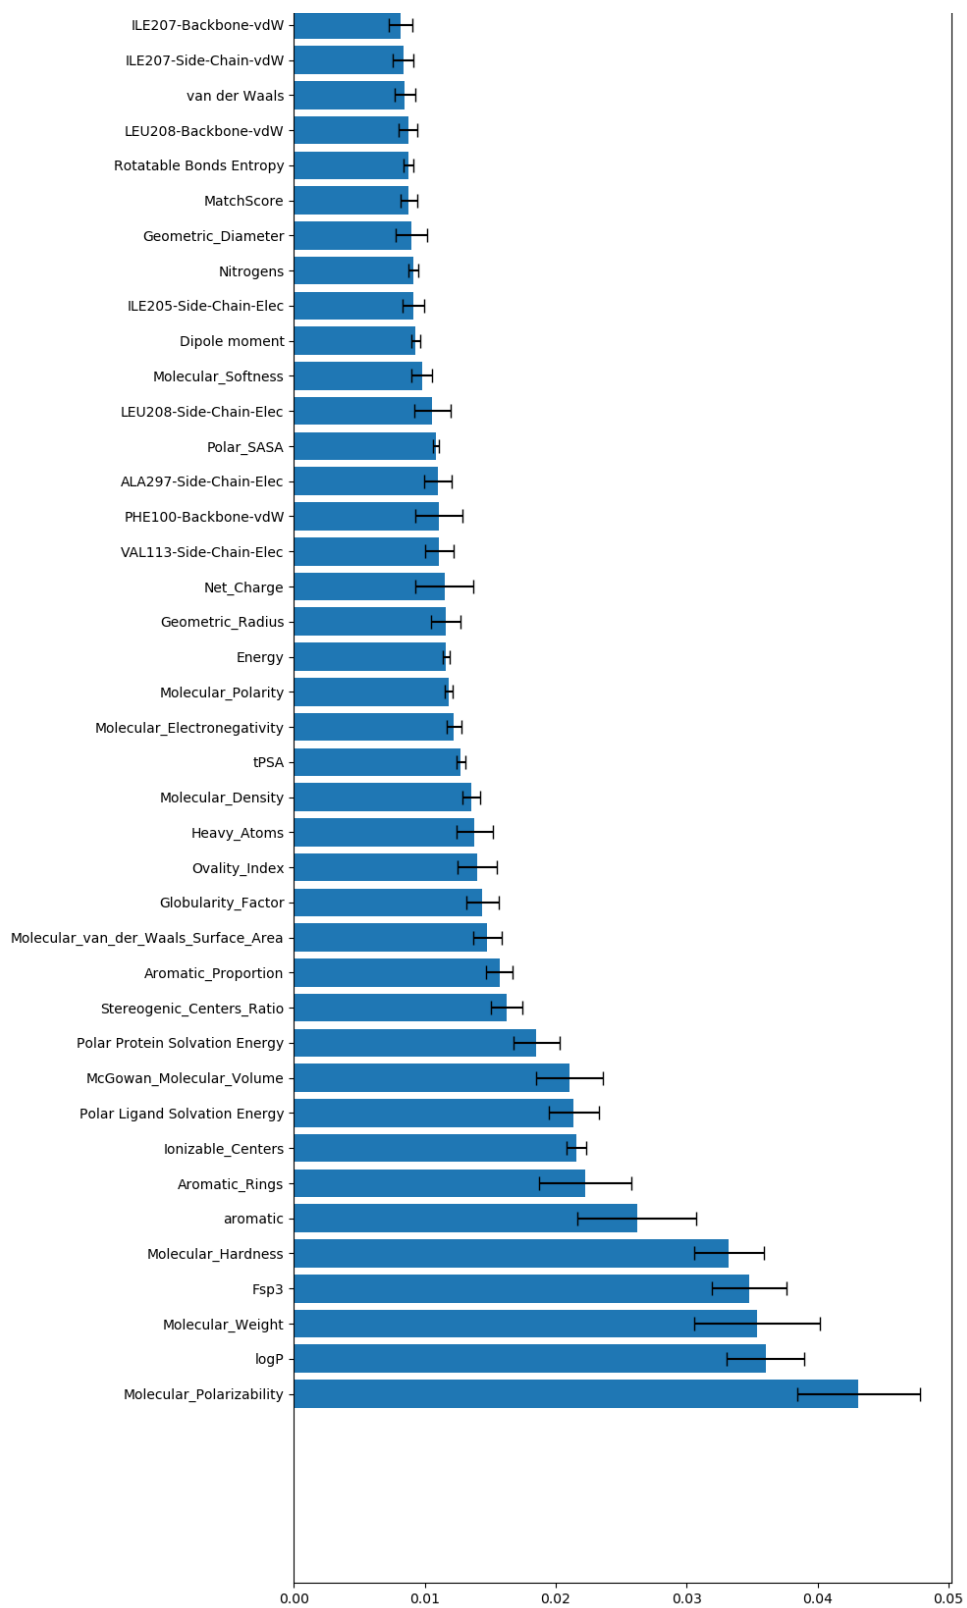

Figure S10: Feature importance of random forest model using selected top 100 features for isoform 2C9.

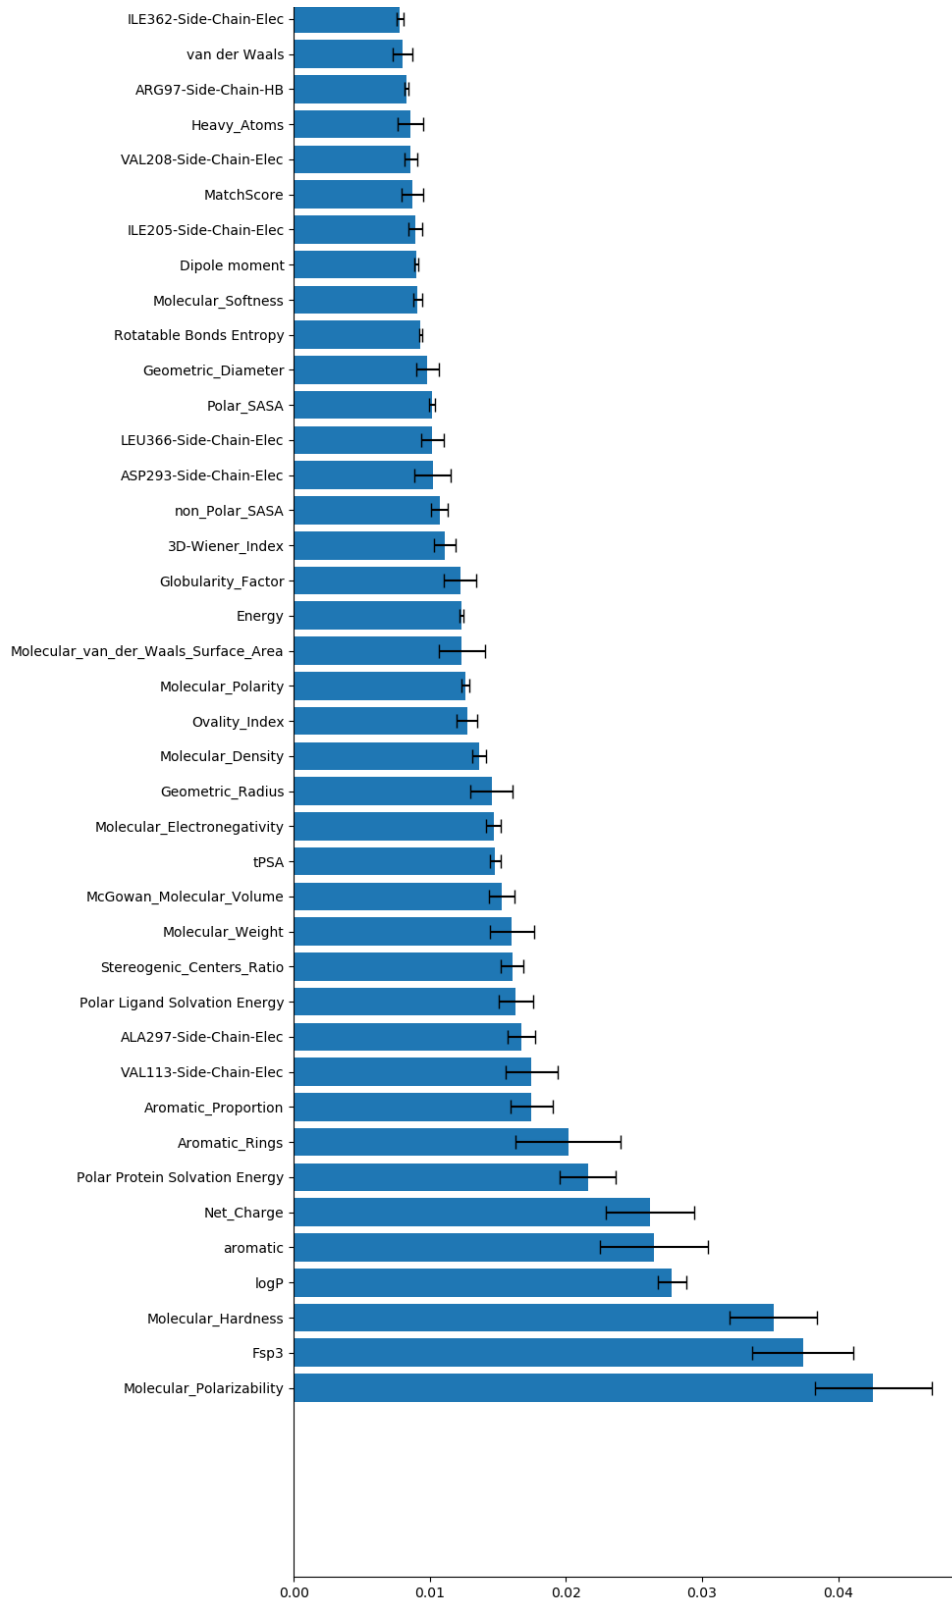

Figure S11: Feature importance of random forest model using selected top 100 features for isoform 2C19.

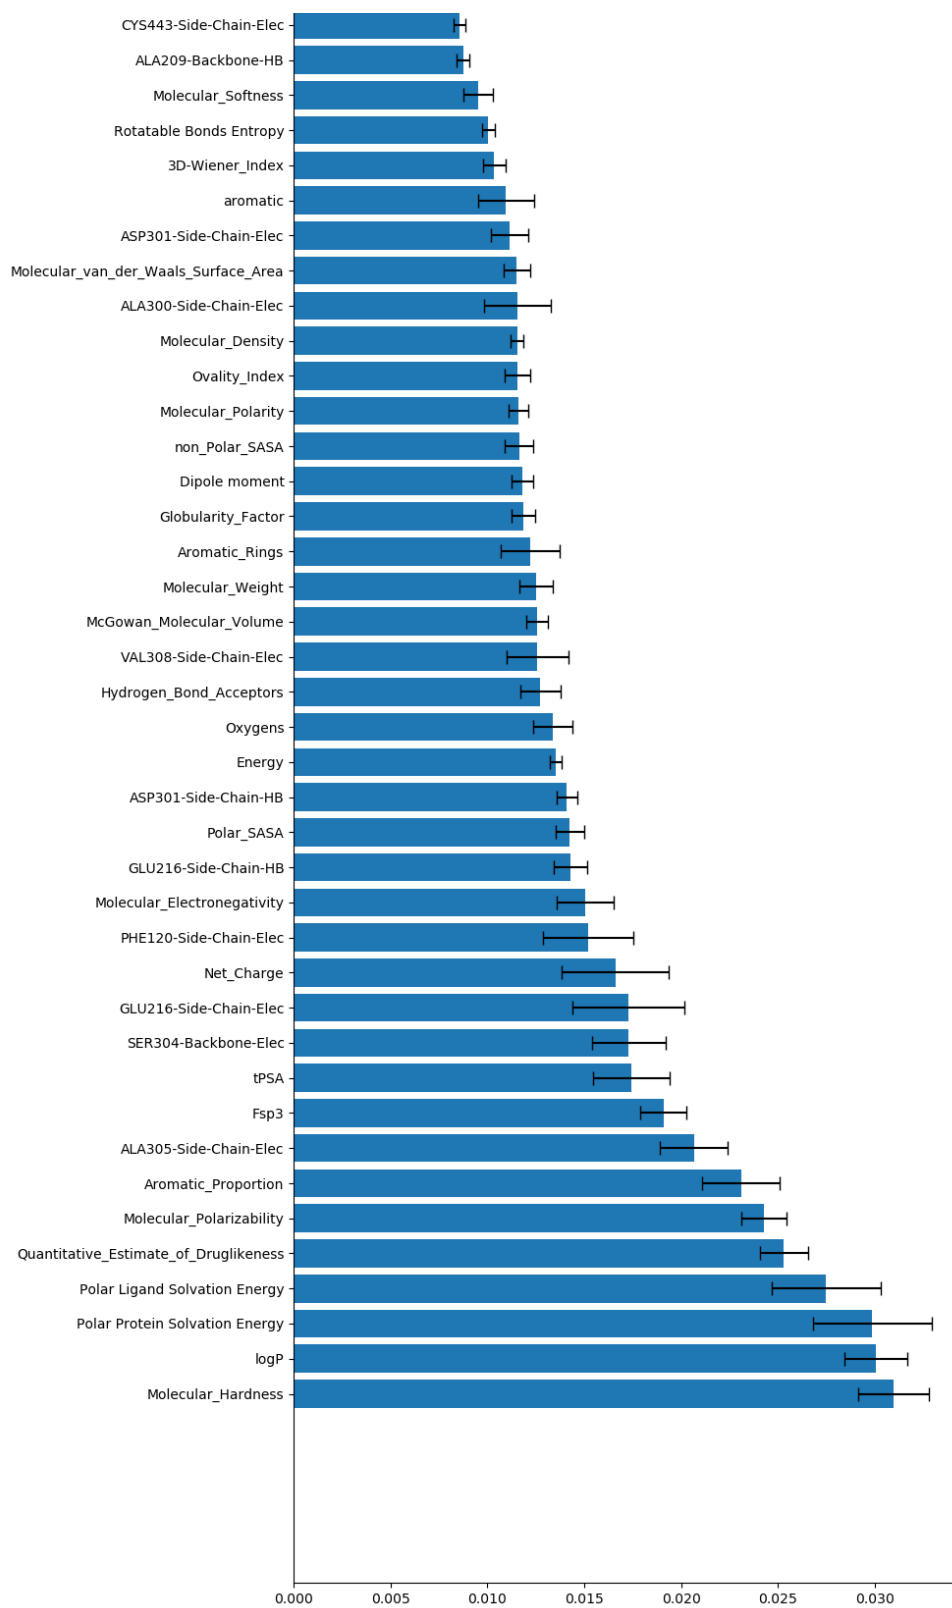

Figure S12: Feature importance of random forest model using selected top 100 features for isoform 2D6.

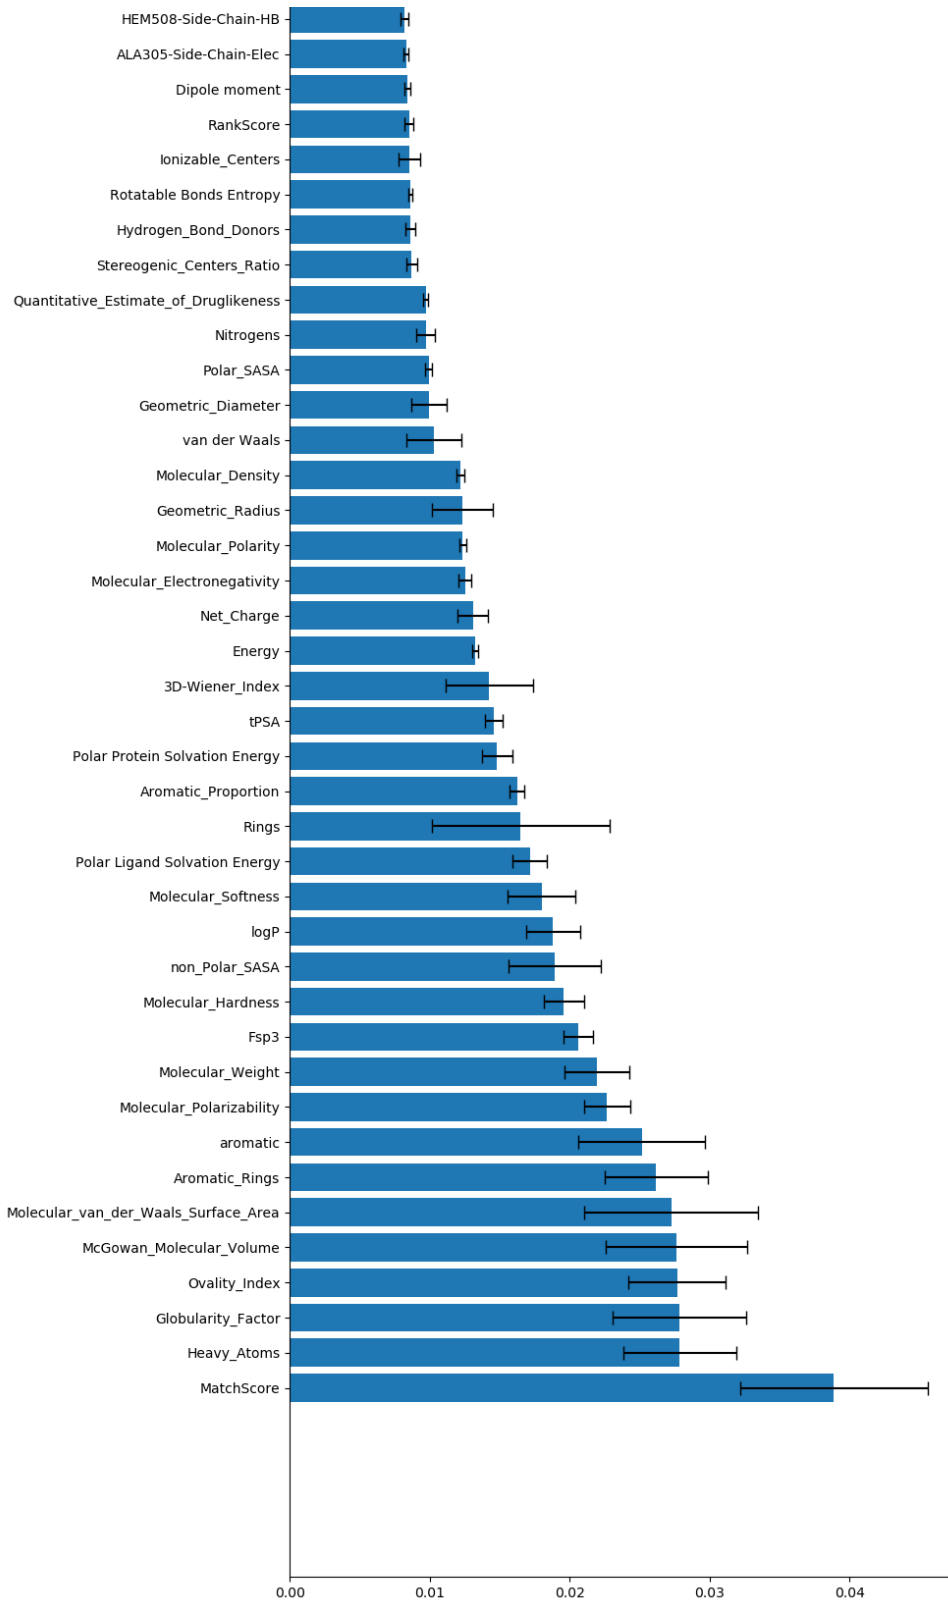

Figure S13: Feature importance of random forest model using selected top 100 features for isoform 3A4.

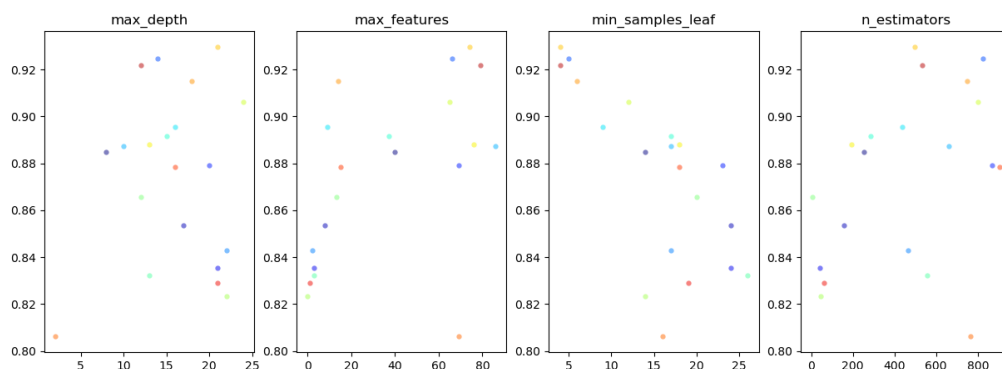

Figure S14: Example of hyperparameter tuning using hyperopt TPE for random forest.

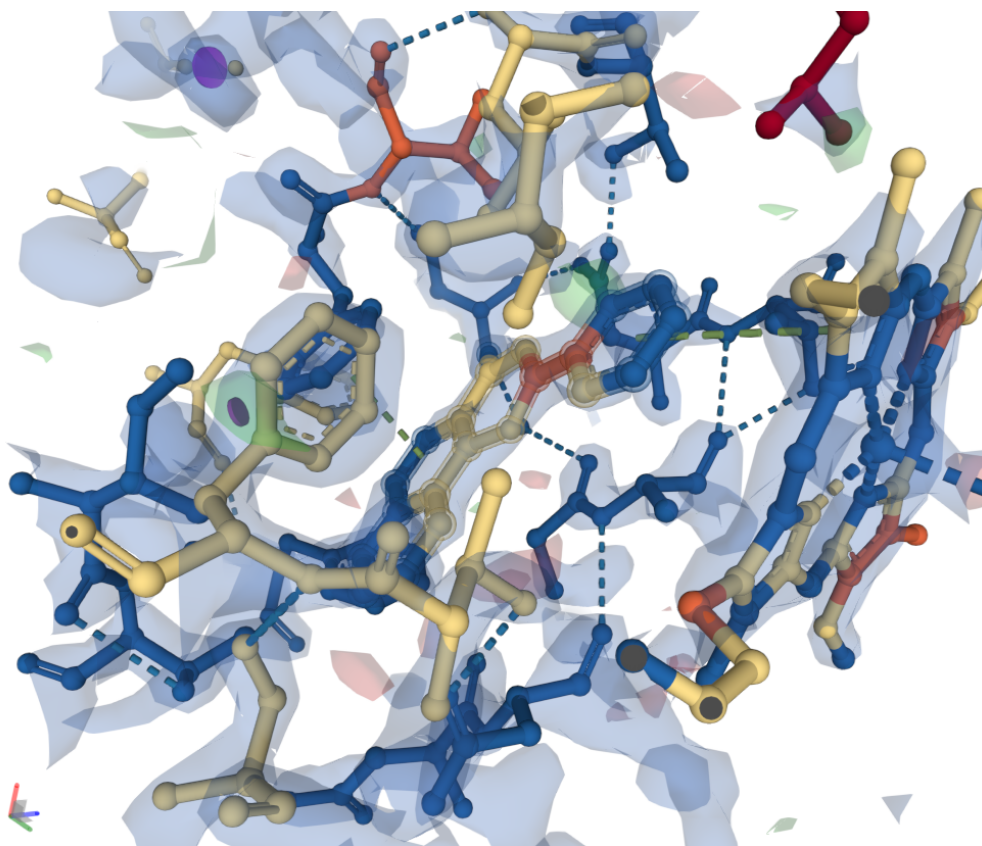

Figure S15: 2HI4: <https://www.rcsb.org/3d-view/2HI4?preset=electronDensityMaps>

Table S2: 1A2 Data

|                                 | <b>30</b> | <b>80</b> | <b>70</b> | <b>40</b> | <b>20</b> | <b>50</b> | <b>60</b> |
|---------------------------------|-----------|-----------|-----------|-----------|-----------|-----------|-----------|
| roc_auc_all                     | 0.888     | 0.926     | 0.922     | 0.911     | 0.849     | 0.911     | 0.919     |
| bootstrapped_scores_mean_all    | 0.888     | 0.927     | 0.922     | 0.911     | 0.849     | 0.911     | 0.918     |
| bootstrapped_scores_std_all     | 0.009     | 0.007     | 0.008     | 0.008     | 0.010     | 0.008     | 0.008     |
| roc_auc_ligand                  | 0.876     | 0.918     | 0.917     | 0.898     | 0.830     | 0.909     | 0.913     |
| bootstrapped_scores_mean_ligand | 0.876     | 0.918     | 0.917     | 0.897     | 0.831     | 0.910     | 0.913     |
| bootstrapped_scores_std_ligand  | 0.010     | 0.008     | 0.008     | 0.009     | 0.012     | 0.009     | 0.009     |
| roc_auc_docked                  | 0.868     | 0.907     | 0.905     | 0.892     | 0.783     | 0.898     | 0.903     |
| bootstrapped_scores_mean_docked | 0.868     | 0.906     | 0.905     | 0.892     | 0.783     | 0.898     | 0.903     |
| bootstrapped_scores_std_docked  | 0.010     | 0.008     | 0.009     | 0.009     | 0.012     | 0.009     | 0.009     |
| fitted_auc_docked               | 0.677     | 0.677     | 0.677     | 0.677     | 0.677     | 0.677     | 0.677     |
| auc_improvement_docked          | 19.120    | 22.960    | 22.780    | 21.470    | 10.640    | 22.120    | 22.580    |
| optimal_threshold_docked        | 0.505     | 0.394     | 0.404     | 0.374     | 0.081     | 0.242     | 0.343     |
| accuracy_docked                 | 0.786     | 0.831     | 0.830     | 0.813     | 0.704     | 0.819     | 0.821     |
| active_pos_rate_docked          | 0.783     | 0.873     | 0.856     | 0.876     | 0.823     | 0.872     | 0.875     |
| inactive_neg_rate_docked        | 0.789     | 0.798     | 0.810     | 0.764     | 0.609     | 0.777     | 0.779     |
| threshold_95_docked             | 0.152     | 0.172     | 0.091     | 0.182     | 0.030     | 0.061     | 0.162     |
| accuracy_95_docked              | 0.731     | 0.769     | 0.735     | 0.752     | 0.639     | 0.755     | 0.767     |
| active_acc_95_docked            | 0.930     | 0.937     | 0.945     | 0.939     | 0.932     | 0.939     | 0.946     |
| inactive_acc_95_docked          | 0.574     | 0.637     | 0.569     | 0.605     | 0.408     | 0.609     | 0.626     |
| fitted_auc_ligand               | 0.677     | 0.677     | 0.677     | 0.677     | 0.677     | 0.677     | 0.677     |
| auc_improvement_ligand          | 19.910    | 24.140    | 24.000    | 22.060    | 15.350    | 23.250    | 23.580    |
| optimal_threshold_ligand        | 0.192     | 0.475     | 0.343     | 0.455     | 0.626     | 0.465     | 0.495     |
| accuracy_ligand                 | 0.778     | 0.846     | 0.839     | 0.824     | 0.741     | 0.840     | 0.841     |
| active_pos_rate_ligand          | 0.899     | 0.864     | 0.879     | 0.872     | 0.836     | 0.840     | 0.842     |
| inactive_neg_rate_ligand        | 0.682     | 0.832     | 0.808     | 0.787     | 0.667     | 0.841     | 0.841     |
| threshold_95_ligand             | 0.051     | 0.172     | 0.071     | 0.152     | 0.162     | 0.061     | 0.182     |
| accuracy_95_ligand              | 0.710     | 0.770     | 0.761     | 0.760     | 0.668     | 0.757     | 0.763     |
| active_acc_95_ligand            | 0.948     | 0.950     | 0.948     | 0.947     | 0.948     | 0.945     | 0.945     |
| inactive_acc_95_ligand          | 0.522     | 0.628     | 0.612     | 0.613     | 0.447     | 0.609     | 0.619     |
| fitted_auc_all                  | 0.677     | 0.677     | 0.677     | 0.677     | 0.677     | 0.677     | 0.677     |
| auc_improvement_all             | 21.100    | 24.930    | 24.470    | 23.390    | 17.170    | 23.420    | 24.170    |
| optimal_threshold_all           | 0.263     | 0.192     | 0.303     | 0.192     | 0.333     | 0.485     | 0.232     |
| accuracy_all                    | 0.796     | 0.830     | 0.833     | 0.798     | 0.761     | 0.835     | 0.816     |
| active_pos_rate_all             | 0.880     | 0.915     | 0.902     | 0.930     | 0.842     | 0.826     | 0.922     |
| inactive_neg_rate_all           | 0.729     | 0.762     | 0.777     | 0.694     | 0.697     | 0.842     | 0.732     |
| threshold_95_all                | 0.101     | 0.111     | 0.162     | 0.182     | 0.061     | 0.232     | 0.172     |
| accuracy_95_all                 | 0.762     | 0.814     | 0.798     | 0.797     | 0.689     | 0.799     | 0.799     |
| active_acc_95_all               | 0.934     | 0.943     | 0.950     | 0.934     | 0.964     | 0.940     | 0.944     |
| inactive_acc_95_all             | 0.625     | 0.713     | 0.679     | 0.689     | 0.471     | 0.687     | 0.684     |

Table S3: 3A4 Data

|                                 | <b>60</b> | <b>20</b> | <b>30</b> | <b>80</b> | <b>40</b> | <b>50</b> | <b>70</b> |
|---------------------------------|-----------|-----------|-----------|-----------|-----------|-----------|-----------|
| Roc_auc_all                     | 0.924     | 0.822     | 0.863     | 0.932     | 0.892     | 0.908     | 0.923     |
| Bootstrapped_scores_mean_all    | 0.924     | 0.822     | 0.863     | 0.932     | 0.892     | 0.907     | 0.923     |
| Bootstrapped_scores_std_all     | 0.007     | 0.011     | 0.010     | 0.007     | 0.008     | 0.008     | 0.007     |
| Roc_auc_ligand                  | 0.914     | 0.808     | 0.838     | 0.919     | 0.863     | 0.895     | 0.915     |
| Bootstrapped_scores_mean_ligand | 0.915     | 0.808     | 0.838     | 0.919     | 0.863     | 0.895     | 0.915     |
| Bootstrapped_scores_std_ligand  | 0.008     | 0.012     | 0.011     | 0.008     | 0.010     | 0.008     | 0.008     |
| Roc_auc_docked                  | 0.878     | 0.762     | 0.839     | 0.892     | 0.850     | 0.862     | 0.885     |
| Bootstrapped_scores_mean_docked | 0.878     | 0.762     | 0.839     | 0.892     | 0.850     | 0.862     | 0.885     |
| Bootstrapped_scores_std_docked  | 0.009     | 0.012     | 0.011     | 0.008     | 0.010     | 0.010     | 0.009     |
| Fitted_auc_docked               | 0.742     | 0.742     | 0.742     | 0.742     | 0.742     | 0.742     | 0.742     |
| Auc_improvement_docked          | 13.610    | 2.010     | 9.730     | 15.080    | 10.860    | 12.020    | 14.300    |
| Optimal_threshold_docked        | 0.333     | 0.061     | 0.384     | 0.495     | 0.404     | 0.273     | 0.576     |
| Accuracy_docked                 | 0.773     | 0.634     | 0.763     | 0.804     | 0.776     | 0.760     | 0.801     |
| Active_pos_rate_docked          | 0.862     | 0.896     | 0.805     | 0.790     | 0.793     | 0.867     | 0.737     |
| Inactive_neg_rate_docked        | 0.714     | 0.459     | 0.735     | 0.813     | 0.765     | 0.689     | 0.844     |
| Threshold_95_docked             | 0.192     | 0.040     | 0.141     | 0.192     | 0.152     | 0.182     | 0.263     |
| Accuracy_95_docked              | 0.743     | 0.622     | 0.700     | 0.741     | 0.713     | 0.746     | 0.742     |
| Active_acc_95_docked            | 0.932     | 0.925     | 0.936     | 0.934     | 0.939     | 0.918     | 0.927     |
| Inactive_acc_95_docked          | 0.617     | 0.420     | 0.542     | 0.613     | 0.562     | 0.631     | 0.619     |
| Fitted_auc_all                  | 0.742     | 0.742     | 0.742     | 0.742     | 0.742     | 0.742     | 0.742     |
| Auc_improvement_all             | 18.220    | 8.090     | 12.120    | 19.080    | 15.000    | 16.610    | 18.180    |
| Optimal_threshold_all           | 0.384     | 0.404     | 0.263     | 0.535     | 0.222     | 0.354     | 0.232     |
| Accuracy_all                    | 0.850     | 0.730     | 0.783     | 0.862     | 0.817     | 0.829     | 0.840     |
| Active_pos_rate_all             | 0.847     | 0.755     | 0.860     | 0.792     | 0.857     | 0.820     | 0.899     |
| Inactive_neg_rate_all           | 0.852     | 0.714     | 0.732     | 0.908     | 0.791     | 0.836     | 0.801     |
| Threshold_95_all                | 0.111     | 0.051     | 0.131     | 0.111     | 0.081     | 0.101     | 0.101     |
| Accuracy_95_all                 | 0.797     | 0.647     | 0.734     | 0.798     | 0.771     | 0.799     | 0.805     |
| Active_acc_95_all               | 0.938     | 0.949     | 0.954     | 0.948     | 0.931     | 0.946     | 0.947     |
| Inactive_acc_95_all             | 0.702     | 0.445     | 0.587     | 0.699     | 0.664     | 0.701     | 0.711     |
| Fitted_auc_ligand               | 0.742     | 0.742     | 0.742     | 0.742     | 0.742     | 0.742     | 0.742     |
| Auc_improvement_ligand          | 17.270    | 6.690     | 9.670     | 17.740    | 12.170    | 15.300    | 17.350    |
| Optimal_threshold_ligand        | 0.354     | 0.212     | 0.202     | 0.263     | 0.111     | 0.202     | 0.485     |
| Accuracy_ligand                 | 0.831     | 0.723     | 0.753     | 0.834     | 0.763     | 0.803     | 0.830     |
| Active_pos_rate_ligand          | 0.883     | 0.795     | 0.814     | 0.877     | 0.898     | 0.901     | 0.792     |
| Inactive_neg_rate_ligand        | 0.796     | 0.675     | 0.713     | 0.805     | 0.674     | 0.738     | 0.855     |
| Threshold_95_ligand             | 0.131     | 0.030     | 0.051     | 0.111     | 0.030     | 0.101     | 0.141     |
| Accuracy_95_ligand              | 0.797     | 0.680     | 0.709     | 0.808     | 0.713     | 0.763     | 0.802     |
| Active_acc_95_ligand            | 0.939     | 0.928     | 0.953     | 0.933     | 0.954     | 0.943     | 0.936     |
| Inactive_acc_95_ligand          | 0.702     | 0.514     | 0.546     | 0.724     | 0.552     | 0.642     | 0.712     |



Table S4: 2C9 Data

|                                 | <b>30</b> | <b>40</b> | <b>60</b> | <b>20</b> | <b>50</b> | <b>80</b> | <b>70</b> |
|---------------------------------|-----------|-----------|-----------|-----------|-----------|-----------|-----------|
| Roc_auc_all                     | 0.833     | 0.839     | 0.865     | 0.773     | 0.847     | 0.875     | 0.874     |
| Bootstrapped_scores_mean_all    | 0.833     | 0.839     | 0.865     | 0.773     | 0.847     | 0.875     | 0.874     |
| Bootstrapped_scores_std_all     | 0.011     | 0.011     | 0.011     | 0.013     | 0.012     | 0.011     | 0.011     |
| Roc_auc_ligand                  | 0.816     | 0.832     | 0.842     | 0.776     | 0.845     | 0.869     | 0.858     |
| Bootstrapped_scores_mean_ligand | 0.816     | 0.832     | 0.842     | 0.775     | 0.845     | 0.868     | 0.858     |
| Bootstrapped_scores_std_ligand  | 0.012     | 0.011     | 0.012     | 0.011     | 0.011     | 0.011     | 0.011     |
| Roc_auc_docked                  | 0.773     | 0.797     | 0.823     | 0.711     | 0.813     | 0.857     | 0.844     |
| Bootstrapped_scores_mean_docked | 0.773     | 0.797     | 0.822     | 0.711     | 0.813     | 0.856     | 0.844     |
| Bootstrapped_scores_std_docked  | 0.013     | 0.012     | 0.012     | 0.013     | 0.012     | 0.011     | 0.011     |
| Fitted_auc_all                  | 0.687     | 0.687     | 0.687     | 0.687     | 0.687     | 0.687     | 0.687     |
| Auc_improvement_all             | 14.630    | 15.190    | 17.820    | 8.650     | 16.000    | 18.840    | 18.740    |
| Optimal_threshold_all           | 0.273     | 0.646     | 0.495     | 0.758     | 0.636     | 0.333     | 0.485     |
| Accuracy_all                    | 0.736     | 0.786     | 0.818     | 0.740     | 0.810     | 0.832     | 0.832     |
| Active_pos_rate_all             | 0.769     | 0.632     | 0.695     | 0.606     | 0.612     | 0.734     | 0.707     |
| Inactive_neg_rate_all           | 0.725     | 0.837     | 0.860     | 0.785     | 0.877     | 0.865     | 0.875     |
| Threshold_95_all                | 0.020     | 0.040     | 0.020     | 0.010     | 0.030     | 0.010     | 0.040     |
| Accuracy_95_all                 | 0.608     | 0.602     | 0.613     | 0.433     | 0.595     | 0.649     | 0.626     |
| Active_acc_95_all               | 0.946     | 0.931     | 0.933     | 0.952     | 0.929     | 0.933     | 0.937     |
| Inactive_acc_95_all             | 0.494     | 0.492     | 0.507     | 0.259     | 0.483     | 0.554     | 0.522     |
| Fitted_auc_docked               | 0.687     | 0.687     | 0.687     | 0.687     | 0.687     | 0.687     | 0.687     |
| Auc_improvement_docked          | 8.630     | 11.020    | 13.610    | 2.430     | 12.590    | 16.970    | 15.700    |
| Optimal_threshold_docked        | 0.222     | 0.394     | 0.535     | 0.313     | 0.414     | 0.455     | 0.566     |
| Accuracy_docked                 | 0.631     | 0.697     | 0.781     | 0.689     | 0.723     | 0.808     | 0.806     |
| Active_pos_rate_docked          | 0.844     | 0.774     | 0.646     | 0.533     | 0.768     | 0.717     | 0.630     |
| Inactive_neg_rate_docked        | 0.560     | 0.671     | 0.827     | 0.741     | 0.709     | 0.838     | 0.865     |
| Threshold_95_docked             | 0.061     | 0.121     | 0.030     | 0.030     | 0.101     | 0.071     | 0.061     |
| Accuracy_95_docked              | 0.516     | 0.570     | 0.555     | 0.465     | 0.584     | 0.596     | 0.584     |
| Active_acc_95_docked            | 0.944     | 0.934     | 0.944     | 0.923     | 0.933     | 0.948     | 0.941     |
| Inactive_acc_95_docked          | 0.372     | 0.449     | 0.425     | 0.312     | 0.468     | 0.479     | 0.464     |
| Fitted_auc_ligand               | 0.687     | 0.687     | 0.687     | 0.687     | 0.687     | 0.687     | 0.687     |
| Auc_improvement_ligand          | 12.890    | 14.540    | 15.550    | 8.860     | 15.760    | 18.160    | 17.100    |
| Optimal_threshold_ligand        | 0.586     | 0.556     | 0.404     | 0.869     | 0.475     | 0.636     | 0.253     |
| Accuracy_ligand                 | 0.745     | 0.779     | 0.794     | 0.753     | 0.786     | 0.834     | 0.797     |
| Active_pos_rate_ligand          | 0.658     | 0.676     | 0.738     | 0.593     | 0.709     | 0.646     | 0.771     |
| Inactive_neg_rate_ligand        | 0.774     | 0.813     | 0.813     | 0.807     | 0.812     | 0.896     | 0.806     |
| Threshold_95_ligand             | 0.061     | 0.020     | 0.020     | 0.040     | 0.051     | 0.010     | 0.020     |
| Accuracy_95_ligand              | 0.581     | 0.577     | 0.573     | 0.423     | 0.610     | 0.678     | 0.623     |
| Active_acc_95_ligand            | 0.948     | 0.925     | 0.939     | 0.944     | 0.919     | 0.911     | 0.922     |
| Inactive_acc_95_ligand          | 0.458     | 0.461     | 0.450     | 0.248     | 0.507     | 0.601     | 0.523     |

Table S5: 2C19

|                                 | <b>30</b> | <b>50</b> | <b>70</b> | <b>80</b> | <b>40</b> | <b>60</b> | <b>20</b> |
|---------------------------------|-----------|-----------|-----------|-----------|-----------|-----------|-----------|
| Roc_auc_all                     | 0.836     | 0.855     | 0.873     | 0.879     | 0.846     | 0.868     | 0.720     |
| Bootstrapped_scores_mean_all    | 0.836     | 0.855     | 0.873     | 0.879     | 0.846     | 0.868     | 0.720     |
| Bootstrapped_scores_std_all     | 0.011     | 0.011     | 0.011     | 0.010     | 0.011     | 0.011     | 0.012     |
| Roc_auc_ligand                  | 0.807     | 0.851     | 0.876     | 0.876     | 0.834     | 0.865     | 0.730     |
| Bootstrapped_scores_mean_ligand | 0.807     | 0.851     | 0.877     | 0.877     | 0.834     | 0.866     | 0.730     |
| Bootstrapped_scores_std_ligand  | 0.013     | 0.011     | 0.010     | 0.010     | 0.012     | 0.011     | 0.013     |
| Roc_auc_docked                  | 0.756     | 0.793     | 0.833     | 0.837     | 0.790     | 0.815     | 0.659     |
| Bootstrapped_scores_mean_docked | 0.756     | 0.793     | 0.832     | 0.838     | 0.790     | 0.814     | 0.658     |
| Bootstrapped_scores_std_docked  | 0.012     | 0.012     | 0.011     | 0.011     | 0.012     | 0.011     | 0.012     |
| Fitted_auc_ligand               | 0.616     | 0.616     | 0.616     | 0.616     | 0.616     | 0.616     | 0.616     |
| Auc_improvement_ligand          | 19.110    | 23.480    | 26.040    | 26.060    | 21.780    | 24.940    | 11.420    |
| Optimal_threshold_ligand        | 0.364     | 0.354     | 0.404     | 0.434     | 0.263     | 0.606     | 0.323     |
| Accuracy_ligand                 | 0.716     | 0.757     | 0.810     | 0.813     | 0.745     | 0.809     | 0.665     |
| Active_pos_rate_ligand          | 0.810     | 0.874     | 0.838     | 0.820     | 0.830     | 0.727     | 0.750     |
| Inactive_neg_rate_ligand        | 0.657     | 0.684     | 0.793     | 0.809     | 0.693     | 0.860     | 0.611     |
| Threshold_95_ligand             | 0.061     | 0.141     | 0.152     | 0.172     | 0.030     | 0.162     | 0.010     |
| Accuracy_95_ligand              | 0.628     | 0.649     | 0.720     | 0.715     | 0.651     | 0.680     | 0.537     |
| Active_acc_95_ligand            | 0.934     | 0.939     | 0.944     | 0.941     | 0.941     | 0.941     | 0.937     |
| Inactive_acc_95_ligand          | 0.439     | 0.470     | 0.581     | 0.575     | 0.470     | 0.517     | 0.290     |
| Fitted_auc_all                  | 0.616     | 0.616     | 0.616     | 0.616     | 0.616     | 0.616     | 0.616     |
| Auc_improvement_all             | 22.030    | 23.920    | 25.700    | 26.360    | 23.050    | 25.260    | 10.430    |
| Optimal_threshold_all           | 0.535     | 0.475     | 0.303     | 0.384     | 0.293     | 0.404     | 0.303     |
| Accuracy_all                    | 0.762     | 0.785     | 0.790     | 0.808     | 0.744     | 0.802     | 0.656     |
| Active_pos_rate_all             | 0.758     | 0.805     | 0.851     | 0.838     | 0.868     | 0.828     | 0.743     |
| Inactive_neg_rate_all           | 0.765     | 0.772     | 0.752     | 0.790     | 0.667     | 0.785     | 0.601     |
| Threshold_95_all                | 0.111     | 0.111     | 0.091     | 0.101     | 0.101     | 0.071     | 0.030     |
| Accuracy_95_all                 | 0.650     | 0.662     | 0.711     | 0.713     | 0.661     | 0.704     | 0.531     |
| Active_acc_95_all               | 0.937     | 0.940     | 0.939     | 0.946     | 0.941     | 0.937     | 0.944     |
| Inactive_acc_95_all             | 0.472     | 0.490     | 0.569     | 0.569     | 0.487     | 0.559     | 0.274     |
| Fitted_auc_docked               | 0.616     | 0.616     | 0.616     | 0.616     | 0.616     | 0.616     | 0.616     |
| Auc_improvement_docked          | 14.070    | 17.750    | 21.680    | 22.160    | 17.410    | 19.920    | 4.280     |
| Optimal_threshold_docked        | 0.424     | 0.364     | 0.434     | 0.424     | 0.414     | 0.465     | 0.202     |
| Accuracy_docked                 | 0.661     | 0.680     | 0.747     | 0.756     | 0.696     | 0.720     | 0.580     |
| Active_pos_rate_docked          | 0.813     | 0.876     | 0.807     | 0.783     | 0.783     | 0.778     | 0.778     |
| Inactive_neg_rate_docked        | 0.567     | 0.559     | 0.709     | 0.739     | 0.642     | 0.684     | 0.457     |
| Threshold_95_docked             | 0.202     | 0.242     | 0.182     | 0.162     | 0.061     | 0.202     | 0.040     |
| Accuracy_95_docked              | 0.578     | 0.614     | 0.634     | 0.665     | 0.612     | 0.642     | 0.482     |
| Active_acc_95_docked            | 0.944     | 0.936     | 0.949     | 0.939     | 0.936     | 0.950     | 0.938     |
| Inactive_acc_95_docked          | 0.351     | 0.413     | 0.438     | 0.496     | 0.411     | 0.450     | 0.200     |

Table S6: 2D6

|                                 | <b>30</b> | <b>70</b> | <b>60</b> | <b>80</b> | <b>50</b> | <b>20</b> | <b>40</b> |
|---------------------------------|-----------|-----------|-----------|-----------|-----------|-----------|-----------|
| Roc_auc_all                     | 0.844     | 0.892     | 0.890     | 0.901     | 0.884     | 0.692     | 0.889     |
| Bootstrapped_scores_mean_all    | 0.844     | 0.892     | 0.889     | 0.901     | 0.885     | 0.692     | 0.890     |
| Bootstrapped_scores_std_all     | 0.014     | 0.012     | 0.013     | 0.012     | 0.012     | 0.015     | 0.012     |
| Roc_auc_ligand                  | 0.817     | 0.880     | 0.867     | 0.880     | 0.864     | 0.715     | 0.874     |
| Bootstrapped_scores_mean_ligand | 0.817     | 0.880     | 0.867     | 0.879     | 0.864     | 0.715     | 0.874     |
| Bootstrapped_scores_std_ligand  | 0.015     | 0.014     | 0.014     | 0.014     | 0.013     | 0.017     | 0.014     |
| Roc_auc_docked                  | 0.823     | 0.842     | 0.839     | 0.854     | 0.833     | 0.624     | 0.827     |
| Bootstrapped_scores_mean_docked | 0.824     | 0.842     | 0.838     | 0.854     | 0.834     | 0.624     | 0.826     |
| Bootstrapped_scores_std_docked  | 0.016     | 0.014     | 0.015     | 0.015     | 0.015     | 0.017     | 0.016     |
| Fitted_auc_ligand               | 0.551     | 0.551     | 0.551     | 0.551     | 0.551     | 0.551     | 0.551     |
| Auc_improvement_ligand          | 26.570    | 32.880    | 31.570    | 32.830    | 31.270    | 16.380    | 32.270    |
| Optimal_threshold_ligand        | 0.162     | 0.192     | 0.313     | 0.697     | 0.253     | 0.051     | 0.545     |
| Accuracy_ligand                 | 0.847     | 0.873     | 0.893     | 0.915     | 0.874     | 0.516     | 0.899     |
| Active_pos_rate_ligand          | 0.586     | 0.711     | 0.557     | 0.491     | 0.601     | 0.869     | 0.495     |
| Inactive_neg_rate_ligand        | 0.886     | 0.897     | 0.944     | 0.980     | 0.916     | 0.462     | 0.961     |
| Threshold_95_ligand             | 0.010     | 0.010     | 0.010     | 0.010     | 0.010     | 0.020     | 0.020     |
| Accuracy_95_ligand              | 0.564     | 0.575     | 0.801     | 0.570     | 0.571     | 0.381     | 0.502     |
| Active_acc_95_ligand            | 0.886     | 0.938     | 0.775     | 0.938     | 0.944     | 0.960     | 0.963     |
| Inactive_acc_95_ligand          | 0.515     | 0.519     | 0.805     | 0.514     | 0.514     | 0.293     | 0.432     |
| Fitted_auc_docked               | 0.551     | 0.551     | 0.551     | 0.551     | 0.551     | 0.551     | 0.551     |
| Auc_improvement_docked          | 27.190    | 29.090    | 28.760    | 30.290    | 28.200    | 7.290     | 27.540    |
| Optimal_threshold_docked        | 0.202     | 0.253     | 0.323     | 0.212     | 0.283     | 0.010     | 0.293     |
| Accuracy_docked                 | 0.833     | 0.853     | 0.874     | 0.864     | 0.855     | 0.727     | 0.858     |
| Active_pos_rate_docked          | 0.553     | 0.590     | 0.493     | 0.640     | 0.530     | 0.430     | 0.568     |
| Inactive_neg_rate_docked        | 0.876     | 0.893     | 0.933     | 0.898     | 0.905     | 0.773     | 0.902     |
| Threshold_95_docked             | 0.020     | 0.020     | 0.010     | 0.010     | 0.020     | 0.010     | 0.020     |
| Accuracy_95_docked              | 0.462     | 0.547     | 0.558     | 0.551     | 0.526     | 0.727     | 0.468     |
| Active_acc_95_docked            | 0.940     | 0.925     | 0.919     | 0.925     | 0.929     | 0.430     | 0.936     |
| Inactive_acc_95_docked          | 0.389     | 0.489     | 0.503     | 0.494     | 0.465     | 0.773     | 0.397     |
| Fitted_auc_all                  | 0.551     | 0.551     | 0.551     | 0.551     | 0.551     | 0.551     | 0.551     |
| Auc_improvement_all             | 29.270    | 34.060    | 33.850    | 34.950    | 33.310    | 14.110    | 33.820    |
| Optimal_threshold_all           | 0.131     | 0.232     | 0.323     | 0.202     | 0.192     | 0.121     | 0.111     |
| Accuracy_all                    | 0.844     | 0.890     | 0.899     | 0.889     | 0.874     | 0.698     | 0.871     |
| Active_pos_rate_all             | 0.678     | 0.617     | 0.565     | 0.680     | 0.653     | 0.526     | 0.713     |
| Inactive_neg_rate_all           | 0.869     | 0.932     | 0.950     | 0.921     | 0.908     | 0.725     | 0.896     |
| Threshold_95_all                | 0.010     | 0.010     | 0.010     | 0.010     | 0.010     | 0.010     | 0.010     |
| Accuracy_95_all                 | 0.593     | 0.677     | 0.717     | 0.624     | 0.609     | 0.419     | 0.694     |
| Active_acc_95_all               | 0.898     | 0.909     | 0.898     | 0.946     | 0.940     | 0.869     | 0.900     |
| Inactive_acc_95_all             | 0.547     | 0.642     | 0.690     | 0.575     | 0.558     | 0.350     | 0.662     |

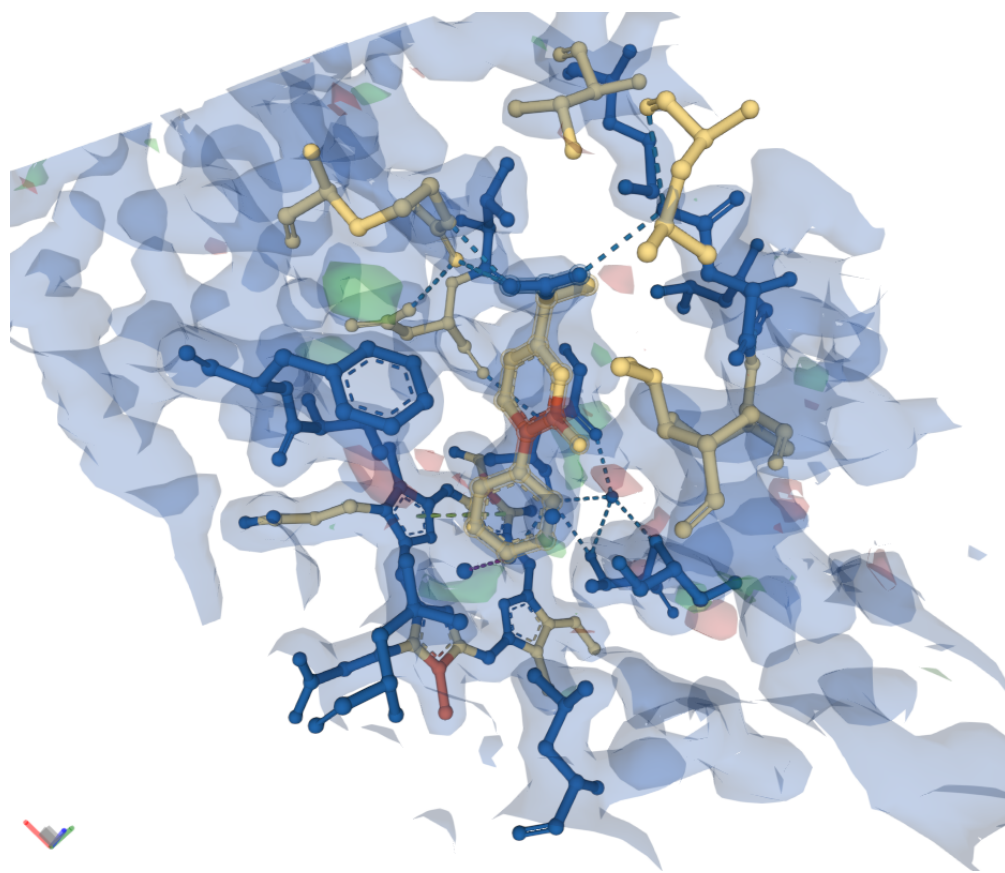

Figure S16: 1R9O: <https://www.rcsb.org/3d-view/1R90?preset=electronDensityMaps>

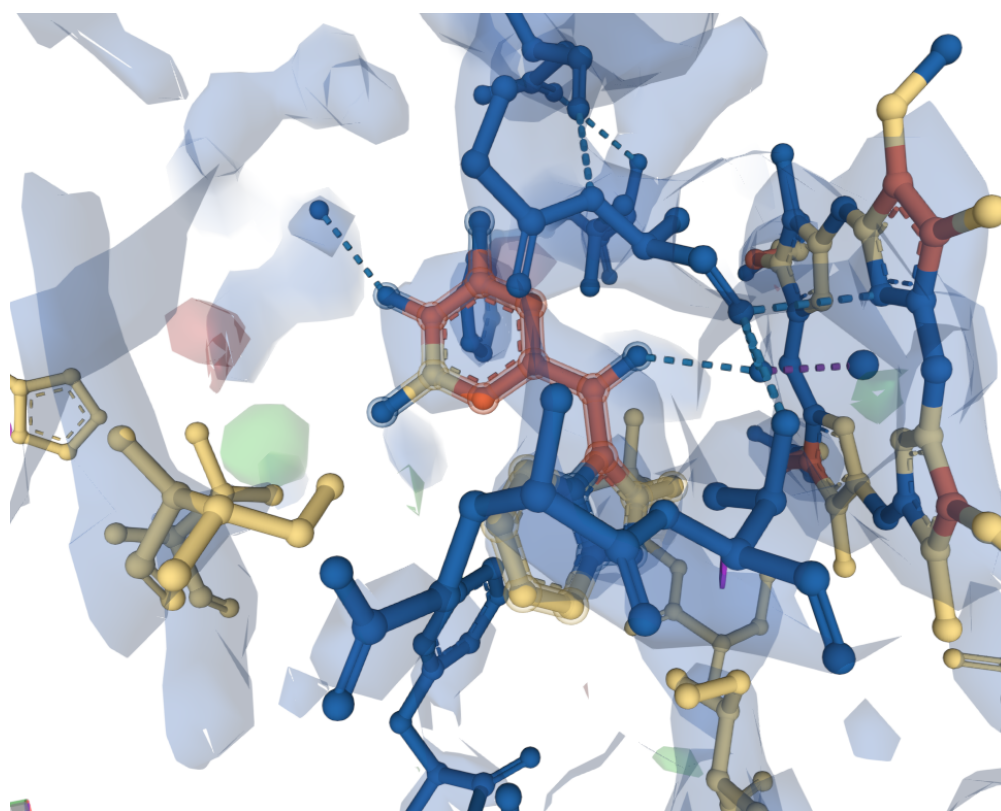

Figure S17: 4GQS: <https://www.rcsb.org/3d-view/4GQS?preset=electronDensityMaps>

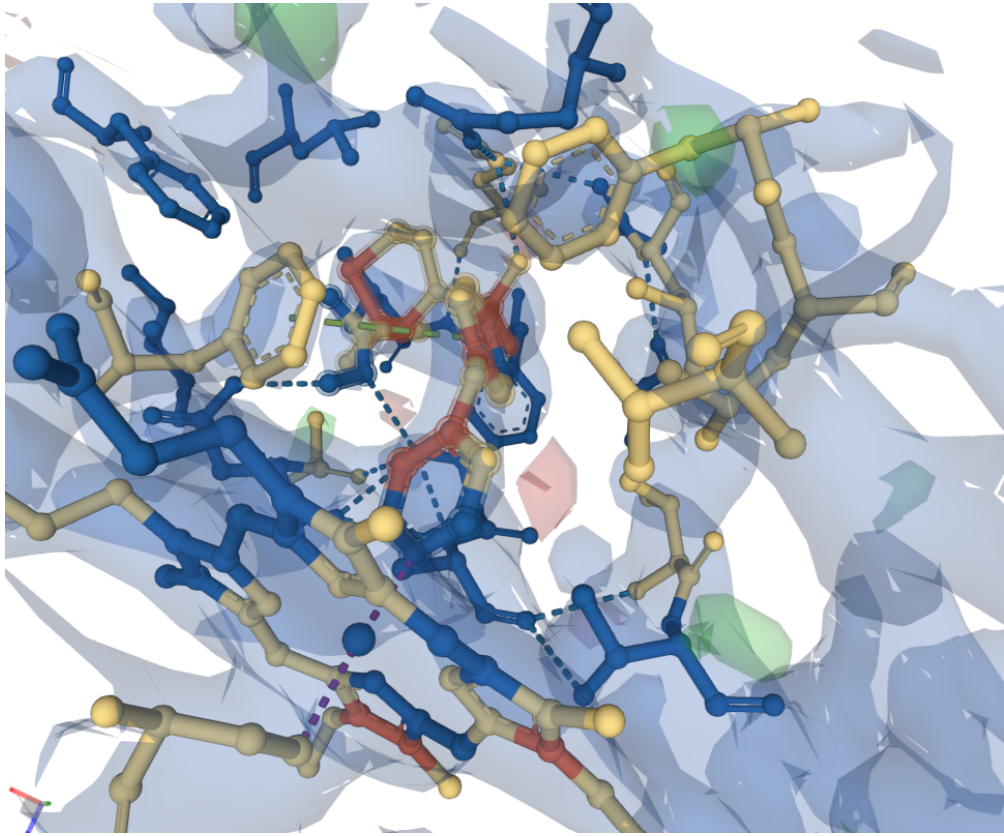

Figure S18: 3QM4: <https://www.rcsb.org/3d-view/3QM4?preset=electronDensityMaps>

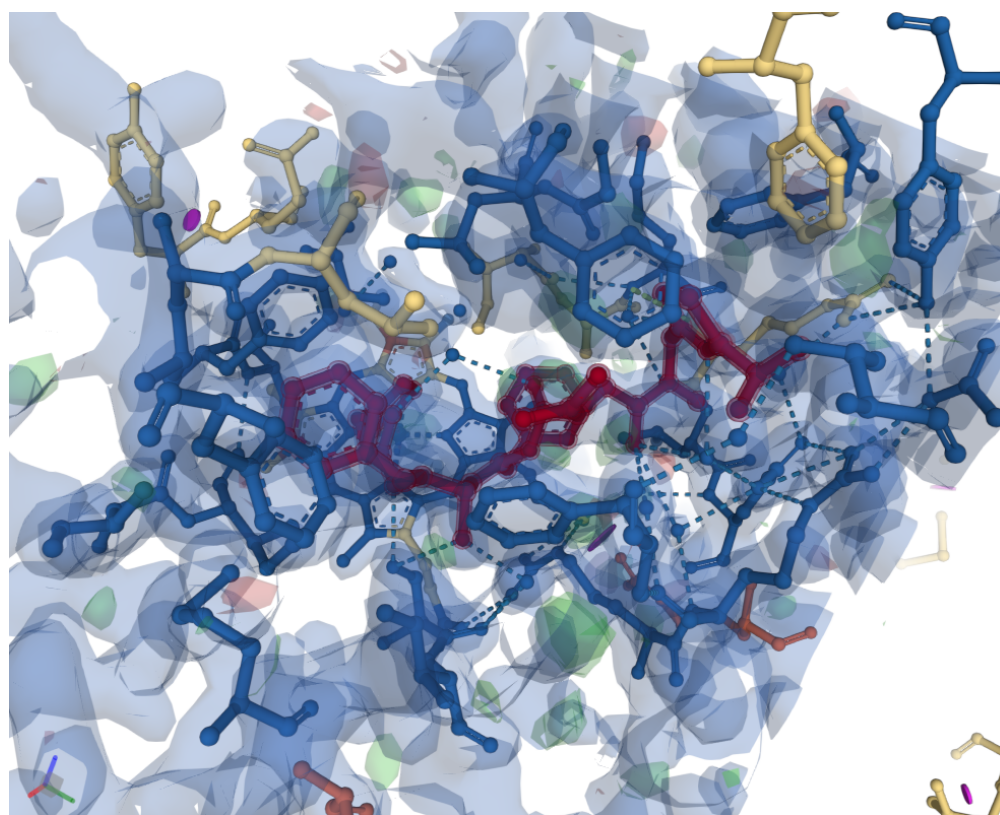

Figure S19: 3NXU: <https://www.rcsb.org/3d-view/3NXU?preset=electronDensityMaps>
